# Supplementary material for: Cyclization reactions in isoprene derived β-hydroxy radicals: implications for the atmospheric oxidation mechanism
Source: Royal Society of Chemistry journal article supplement (doi:10.1039/b306580d), 2003-01-01
Supplement: b306580d.pdf [file b306580d.pdf]

## **Cyclization Reactions in Isoprene Derived $\beta$ -Hydroxy Radicals: Implications for the Atmospheric Oxidation Mechanism**

Jiho Park,<sup>a</sup> Candice G. Jongsma,<sup>a</sup> Renyi Zhang,<sup>b</sup> and Simon W. North<sup>a\*</sup>

<sup>a</sup>*Department of Chemistry, Texas A&M University, P. O. Box 30012, College Station, Texas 77842. E-mail: north@mail.chem.tamu.edu*

<sup>b</sup>*Department of Atmospheric Sciences, Texas A&M University, College Station, Texas, 77842. E-mail: Zhang@ariel.met.tamu.edu*

Table IS. Optimized geometry of isomer IIa.

| Atomic Number | Coordinates (Angstroms) |           |           |
|---------------|-------------------------|-----------|-----------|
|               | x                       | y         | z         |
| 6             | -1.221772               | -1.255195 | -0.324242 |
| 6             | -0.382183               | -0.050810 | -0.011811 |
| 6             | 0.991919                | -0.184490 | -0.651060 |
| 6             | 2.146345                | 0.023523  | -0.020562 |
| 6             | -1.065277               | 1.243870  | -0.503983 |
| 1             | -1.000893               | -1.911378 | -1.159761 |
| 1             | -2.148380               | -1.400944 | 0.222834  |
| 1             | 0.986910                | -0.463980 | -1.705284 |
| 1             | 2.169941                | 0.318099  | 1.024759  |
| 1             | 3.099922                | -0.079971 | -0.530634 |
| 1             | -2.068289               | 1.323587  | -0.072890 |
| 1             | -0.472318               | 2.108159  | -0.186893 |
| 1             | -1.147965               | 1.251542  | -1.595199 |
| 8             | -0.287311               | 0.114257  | 1.413583  |
| 1             | 0.065362                | -0.720563 | 1.764353  |

Table IIS. Optimized geometry of transition state species IIts1.

| Atomic Number | Coordinates (Angstroms) |           |           |
|---------------|-------------------------|-----------|-----------|
|               | x                       | y         | z         |
| 6             | 0.933825                | -0.557314 | 1.332475  |
| 6             | 0.400409                | -0.051684 | 0.019649  |
| 6             | -0.945981               | 0.598342  | 0.314689  |
| 6             | -2.159530               | 0.155588  | -0.018862 |
| 6             | 1.352276                | 0.986552  | -0.603641 |
| 1             | 0.638317                | -1.543773 | 1.672443  |
| 1             | 1.446548                | 0.105724  | 2.022458  |
| 1             | -0.865618               | 1.515762  | 0.896517  |
| 1             | -2.338991               | -0.755000 | -0.589346 |
| 1             | -3.054596               | 0.697190  | 0.272501  |
| 1             | 2.314103                | 0.512209  | -0.820922 |
| 1             | 0.929053                | 1.367746  | -1.538124 |
| 1             | 1.523278                | 1.828387  | 0.076940  |
| 8             | 0.316974                | -1.146102 | -0.899016 |
| 1             | -0.613874               | -1.348334 | -1.066201 |

Table IIIS. Optimized geometry of isomer IIb.

| Atomic Number | Coordinates (Angstroms) |           |           |
|---------------|-------------------------|-----------|-----------|
|               | x                       | y         | z         |
| 6             | 0.167713                | -0.791894 | 1.083892  |
| 6             | -0.512543               | 0.064265  | 0.076663  |
| 6             | 0.819251                | -0.616153 | -0.309090 |
| 6             | 2.032342                | 0.164410  | -0.487117 |
| 6             | -1.796054               | -0.377929 | -0.592151 |
| 1             | -0.253760               | -1.765140 | 1.323048  |
| 1             | 0.652572                | -0.281650 | 1.910634  |
| 1             | 0.713297                | -1.476842 | -0.967034 |
| 1             | 2.203920                | 1.061046  | 0.097549  |
| 1             | 2.799936                | -0.153450 | -1.183082 |
| 1             | -2.657567               | -0.126158 | 0.037644  |
| 1             | -1.926536               | 0.122337  | -1.560905 |
| 1             | -1.802374               | -1.458544 | -0.770725 |
| 8             | -0.458093               | 1.439223  | 0.368960  |
| 1             | -0.328999               | 1.908422  | -0.471994 |

Table IVS. Optimized geometry of transition state species II<sub>ts</sub>2.

| Atomic Number | Coordinates (Angstroms) |           |           |
|---------------|-------------------------|-----------|-----------|
|               | x                       | y         | z         |
| 6             | 0.257231                | -0.584844 | 1.087922  |
| 6             | -0.637647               | 0.083865  | 0.119515  |
| 6             | 1.063079                | -0.656564 | -0.179560 |
| 6             | 2.114764                | 0.195270  | -0.500263 |
| 6             | -1.796933               | -0.592250 | -0.548305 |
| 1             | -0.084265               | -1.534315 | 1.504835  |
| 1             | 0.662580                | 0.075783  | 1.855270  |
| 1             | 0.893625                | -1.533671 | -0.800209 |
| 1             | 2.387791                | 1.025469  | 0.143724  |
| 1             | 2.634800                | 0.105863  | -1.448670 |
| 1             | -2.723997               | -0.454332 | 0.031031  |
| 1             | -1.979494               | -0.187824 | -1.554196 |
| 1             | -1.622331               | -1.668007 | -0.650173 |
| 8             | -0.669677               | 1.458788  | 0.214416  |
| 1             | -0.814261               | 1.827872  | -0.672795 |

Table VS. Optimized geometry of isomer IIc.

| Atomic Number | Coordinates (Angstroms) |           |           |
|---------------|-------------------------|-----------|-----------|
|               | x                       | y         | z         |
| 6             | 0.297959                | -0.745959 | 0.195690  |
| 6             | -0.937501               | 0.029392  | -0.158026 |
| 6             | 1.554712                | -0.222055 | -0.456772 |
| 6             | 2.675401                | 0.094083  | 0.190373  |
| 6             | -2.302132               | -0.566776 | -0.004393 |
| 1             | 0.133409                | -1.788676 | -0.113962 |
| 1             | 0.447394                | -0.770709 | 1.291526  |
| 1             | 1.509748                | -0.112823 | -1.540796 |
| 1             | 2.753511                | 0.009889  | 1.272621  |
| 1             | 3.557268                | 0.452765  | -0.333771 |
| 1             | -2.634193               | -0.605910 | 1.050350  |
| 1             | -3.059108               | 0.011447  | -0.554893 |
| 1             | -2.328456               | -1.590372 | -0.392438 |
| 8             | -0.807775               | 1.380595  | 0.103335  |
| 1             | -1.648007               | 1.817517  | -0.106551 |

Table VIS. Optimized geometry of isomer IIIa.

| Atomic Number | Coordinates (Angstroms) |           |           |
|---------------|-------------------------|-----------|-----------|
|               | x                       | y         | z         |
| 6             | 0.126269                | -0.217261 | -0.735266 |
| 6             | -0.625776               | -0.077248 | 0.585430  |
| 1             | -1.583918               | -0.612301 | 0.483823  |
| 6             | -0.904416               | 1.355818  | 0.907466  |
| 1             | -1.810260               | 1.835563  | 0.551000  |
| 1             | -0.110159               | 1.981796  | 1.303958  |
| 6             | 1.568988                | 0.219567  | -0.745321 |
| 1             | 2.013763                | 0.084005  | -1.735762 |
| 1             | 2.148119                | -0.357294 | -0.016494 |
| 1             | 1.670700                | 1.276489  | -0.467695 |
| 6             | -0.498926               | -0.690336 | -1.817732 |
| 1             | -1.535138               | -1.018588 | -1.784935 |
| 1             | 0.004062                | -0.767316 | -2.778443 |
| 8             | 0.178130                | -0.689652 | 1.602780  |
| 1             | -0.219043               | -0.448371 | 2.454847  |

Table VIIS. Optimized geometry of transition state species IIIts1.

| Atomic Number | Coordinates (Angstroms) |           |           |
|---------------|-------------------------|-----------|-----------|
|               | x                       | y         | z         |
| 6             | -0.630818               | 0.009964  | -0.108672 |
| 6             | 0.757015                | -0.509515 | -0.311789 |
| 1             | 0.798983                | -1.368132 | -0.993266 |
| 6             | 0.541731                | -0.875018 | 1.106150  |
| 1             | 0.230470                | -1.876407 | 1.375890  |
| 1             | 0.794379                | -0.176640 | 1.894600  |
| 6             | -0.806595               | 1.454484  | 0.318413  |
| 1             | -1.698885               | 1.574258  | 0.942190  |
| 1             | -0.929081               | 2.088273  | -0.568337 |
| 1             | 0.058954                | 1.833116  | 0.865295  |
| 6             | -1.736841               | -0.732737 | -0.521665 |
| 1             | -2.746556               | -0.383263 | -0.331283 |
| 1             | -1.625162               | -1.712247 | -0.977635 |
| 8             | 1.725990                | 0.471380  | -0.610049 |
| 1             | 2.562020                | 0.166933  | -0.221685 |

Table VIIS. Optimized geometry of isomer IIIb.

| Atomic Number | Coordinates (Angstroms) |           |           |
|---------------|-------------------------|-----------|-----------|
|               | x                       | y         | z         |
| 6             | -0.589902               | -0.002180 | 0.035744  |
| 6             | 0.790693                | -0.573347 | -0.317319 |
| 1             | 0.792570                | -1.424882 | -1.000105 |
| 6             | 0.253770                | -0.783698 | 1.063586  |
| 1             | -0.081516               | -1.775044 | 1.357821  |
| 1             | 0.698447                | -0.194825 | 1.862768  |
| 6             | -0.704699               | 1.502324  | 0.224086  |
| 1             | -1.474315               | 1.739407  | 0.968068  |
| 1             | -0.984390               | 1.987213  | -0.718746 |
| 1             | 0.243565                | 1.935488  | 0.549368  |
| 6             | -1.762236               | -0.668483 | -0.531473 |
| 1             | -1.787700               | -1.746392 | -0.658559 |
| 1             | -2.609165               | -0.093872 | -0.890149 |
| 8             | 1.832299                | 0.340792  | -0.530406 |
| 1             | 2.618352                | -0.001119 | -0.074960 |

Table IXS. Optimized geometry of transition state species III<sub>ts</sub>2.

| Atomic Number | Coordinates (Angstroms) |           |           |
|---------------|-------------------------|-----------|-----------|
|               | x                       | y         | z         |
| 6             | -0.760761               | -0.003596 | 0.108549  |
| 6             | 0.951701                | -0.617140 | -0.307809 |
| 1             | 0.913465                | -1.408482 | -1.046186 |
| 6             | 0.232966                | -0.728594 | 0.978546  |
| 1             | -0.050674               | -1.732471 | 1.301846  |
| 1             | 0.651576                | -0.149766 | 1.808130  |
| 6             | -0.760211               | 1.510003  | 0.146144  |
| 1             | -1.158926               | 1.881961  | 1.100045  |
| 1             | -1.385133               | 1.916201  | -0.655910 |
| 1             | 0.247228                | 1.921963  | 0.016830  |
| 6             | -1.824874               | -0.693371 | -0.482609 |
| 1             | -1.932146               | -1.769493 | -0.379995 |
| 1             | -2.517608               | -0.185703 | -1.146151 |
| 8             | 1.986576                | 0.268298  | -0.502090 |
| 1             | 2.306691                | 0.575595  | 0.361184  |

Table XS. Optimized geometry of transition state species III<sub>c</sub>.

| Atomic Number | Coordinates (Angstroms) |           |           |
|---------------|-------------------------|-----------|-----------|
|               | x                       | y         | z         |
| 6             | -0.998751               | -0.020989 | 0.100826  |
| 6             | 1.409932                | -0.724773 | -0.271841 |
| 1             | 1.371302                | -1.159908 | -1.266710 |
| 6             | 0.204964                | -0.799130 | 0.623278  |
| 1             | -0.072973               | -1.852480 | 0.749638  |
| 1             | 0.478707                | -0.425988 | 1.626012  |
| 6             | -0.858966               | 1.480124  | 0.063144  |
| 1             | -0.710759               | 1.885550  | 1.075087  |
| 1             | -1.746142               | 1.958440  | -0.362941 |
| 1             | 0.014790                | 1.780968  | -0.528048 |
| 6             | -2.100266               | -0.650435 | -0.321942 |
| 1             | -2.190185               | -1.733723 | -0.287912 |
| 1             | -2.953328               | -0.105448 | -0.719187 |
| 8             | 2.207965                | 0.396803  | -0.260393 |
| 1             | 2.203401                | 0.769380  | 0.636426  |

Table XIS. Frequencies of isomer II, its isomers, and transition state species ( $\text{cm}^{-1}$ ).  
 The imaginary frequencies of transition state species are indicated by *i*.

| IIa       | IIIs1             | IIb       | IIIs2             | IIc       |
|-----------|-------------------|-----------|-------------------|-----------|
| 116.5505  | 421.1774 <i>i</i> | 187.5619  | 519.0532 <i>i</i> | 58.7710   |
| 125.7830  | 76.1868           | 207.5682  | 157.2357          | 84.4112   |
| 248.7298  | 167.5949          | 213.1639  | 167.1045          | 167.7469  |
| 285.5611  | 252.8581          | 243.5630  | 218.5420          | 212.0726  |
| 301.8700  | 283.3870          | 305.0972  | 316.7480          | 341.7793  |
| 319.2441  | 298.7382          | 364.5818  | 359.6586          | 358.0009  |
| 380.5773  | 348.9760          | 410.2843  | 391.9196          | 369.5591  |
| 417.6284  | 400.8695          | 437.0555  | 448.2876          | 415.6092  |
| 436.1928  | 435.4210          | 476.5983  | 451.5772          | 471.5390  |
| 525.7997  | 506.6632          | 551.1038  | 504.5856          | 624.3467  |
| 578.2846  | 567.9758          | 655.6541  | 649.2463          | 833.5028  |
| 702.7703  | 682.0618          | 794.1119  | 779.8694          | 916.5523  |
| 742.0788  | 744.2266          | 855.8728  | 876.9626          | 934.1459  |
| 892.5397  | 902.8564          | 900.1653  | 901.5910          | 941.1197  |
| 951.8474  | 912.7055          | 935.8257  | 957.1470          | 1008.7221 |
| 963.6279  | 928.8558          | 1000.7968 | 994.5830          | 1029.5950 |
| 996.0277  | 969.2205          | 1032.6962 | 1030.0979         | 1038.6142 |
| 1034.6878 | 1026.2444         | 1057.3604 | 1070.7855         | 1129.4419 |
| 1044.5250 | 1050.2064         | 1102.7580 | 1168.9883         | 1137.4829 |
| 1051.7745 | 1116.3600         | 1117.0953 | 1198.9805         | 1225.8866 |
| 1206.5303 | 1206.3884         | 1199.8616 | 1216.5738         | 1309.5615 |
| 1261.4108 | 1246.6938         | 1257.3597 | 1272.9590         | 1334.6943 |
| 1329.8891 | 1314.3032         | 1284.2395 | 1338.9465         | 1354.8607 |
| 1349.3406 | 1364.2133         | 1376.5221 | 1418.6135         | 1418.8314 |
| 1417.2418 | 1423.5398         | 1421.9755 | 1425.0301         | 1440.8291 |
| 1455.5951 | 1462.8145         | 1441.5807 | 1443.8559         | 1470.2926 |
| 1474.0140 | 1479.4901         | 1491.5319 | 1497.2731         | 1487.6551 |
| 1512.0353 | 1515.7209         | 1499.2120 | 1507.0048         | 1502.7973 |
| 1519.4473 | 1521.8610         | 1515.6831 | 1524.9197         | 1520.3164 |
| 1726.1387 | 1712.7764         | 1529.9969 | 1536.8069         | 1733.3581 |
| 3057.3758 | 3056.1981         | 3038.1798 | 3000.4349         | 2944.1329 |
| 3135.6210 | 3128.6925         | 3099.5783 | 3052.1137         | 2951.2690 |
| 3138.5087 | 3142.1204         | 3121.5815 | 3097.1280         | 3035.0036 |
| 3148.1324 | 3147.1263         | 3146.3775 | 3121.2002         | 3036.1531 |
| 3167.2807 | 3164.9899         | 3155.5346 | 3162.9334         | 3115.0952 |
| 3172.2032 | 3170.9292         | 3183.8803 | 3169.6852         | 3148.6145 |
| 3250.9544 | 3230.0013         | 3238.5694 | 3178.3604         | 3158.9994 |
| 3273.9141 | 3281.2710         | 3282.5240 | 3256.4994         | 3234.6967 |
| 3717.1739 | 3784.5717         | 3710.8450 | 3699.1493         | 3743.9568 |

Table XIIS. Frequencies of isomer III, its isomers, and transition state species ( $\text{cm}^{-1}$ ).  
 The imaginary frequencies of transition state species are indicated by *i*.

| IIIa      | IIIts1            | IIIb      | IIIts2            | IIIc      |
|-----------|-------------------|-----------|-------------------|-----------|
| 71.0970   | 578.4633 <i>i</i> | 134.6837  | 521.6374 <i>i</i> | 74.0373   |
| 175.0798  | 136.5661          | 177.0685  | 164.9460          | 116.9755  |
| 211.2211  | 192.3271          | 215.4250  | 187.6177          | 204.7964  |
| 236.0633  | 263.5563          | 245.7425  | 243.7445          | 223.0484  |
| 276.5982  | 294.6762          | 271.5383  | 273.6971          | 338.9256  |
| 331.9823  | 374.8757          | 358.6745  | 369.9453          | 398.0772  |
| 365.6177  | 388.0628          | 382.0253  | 398.3840          | 418.2589  |
| 439.7943  | 446.0221          | 451.5837  | 449.0188          | 451.0853  |
| 522.3369  | 510.1753          | 477.7764  | 476.1115          | 557.6490  |
| 562.5810  | 519.9007          | 514.3485  | 511.7135          | 660.2828  |
| 600.2330  | 668.4245          | 707.5276  | 630.5355          | 726.1889  |
| 741.5064  | 673.9247          | 750.5209  | 745.2950          | 821.1820  |
| 784.0306  | 724.1886          | 883.7460  | 786.6145          | 899.5111  |
| 910.0500  | 792.3626          | 933.7186  | 908.1627          | 917.4181  |
| 925.0870  | 893.5886          | 952.5781  | 966.5184          | 977.9654  |
| 987.9368  | 971.4182          | 984.0250  | 1001.8727         | 1005.0024 |
| 1029.6712 | 1018.3306         | 1044.5919 | 1046.7072         | 1056.6531 |
| 1082.3362 | 1068.8977         | 1055.3483 | 1064.3405         | 1086.4862 |
| 1090.7197 | 1106.4549         | 1105.9471 | 1096.0244         | 1176.9306 |
| 1117.0771 | 1173.4067         | 1135.1663 | 1188.4823         | 1208.1660 |
| 1239.3034 | 1207.6321         | 1190.4242 | 1233.1829         | 1296.9501 |
| 1319.5382 | 1298.5270         | 1287.2850 | 1302.9753         | 1322.8046 |
| 1362.0433 | 1334.7143         | 1304.1556 | 1342.4256         | 1353.9872 |
| 1386.8436 | 1369.0319         | 1349.7975 | 1390.4318         | 1438.2959 |
| 1435.1353 | 1430.5959         | 1421.7904 | 1426.6767         | 1445.6011 |
| 1473.0247 | 1448.3089         | 1442.1181 | 1445.4766         | 1470.8732 |
| 1476.0632 | 1481.9444         | 1488.1114 | 1495.9870         | 1490.2788 |
| 1507.3123 | 1515.4577         | 1504.5884 | 1518.9869         | 1511.1649 |
| 1527.6871 | 1519.1496         | 1521.7824 | 1528.9364         | 1530.7734 |
| 1728.1043 | 1537.5118         | 1533.1425 | 1536.5546         | 1728.2730 |
| 2988.5219 | 3047.9228         | 3051.0953 | 3033.4288         | 2978.0084 |
| 3048.8874 | 3054.7652         | 3107.0867 | 3069.6913         | 3026.0700 |
| 3107.2726 | 3110.0540         | 3115.0470 | 3092.4272         | 3078.3840 |
| 3135.1020 | 3154.7304         | 3136.8933 | 3121.5022         | 3084.7713 |
| 3157.4995 | 3165.1906         | 3152.4145 | 3141.6634         | 3128.5999 |
| 3166.3145 | 3191.6981         | 3169.7259 | 3163.1416         | 3155.2166 |
| 3233.5764 | 3253.5052         | 3223.8059 | 3234.4192         | 3200.8364 |
| 3272.3794 | 3300.7296         | 3267.7241 | 3250.2056         | 3230.4984 |
| 3732.4097 | 3723.8872         | 3716.4781 | 3719.0076         | 3727.7471 |



Table XIIS. Moments of inertia of isomer II, its isomers, and transition state species (amu\*bohr<sup>2</sup>).

| <b>IIa</b> | <b>IIts1</b> | <b>IIb</b> | <b>IIts2</b> | <b>IIc</b> |
|------------|--------------|------------|--------------|------------|
| 381.91701  | 365.90816    | 347.32041  | 335.02756    | 294.78588  |
| 652.38579  | 588.05866    | 583.15831  | 634.55521    | 770.07087  |
| 721.81857  | 698.09185    | 698.31373  | 762.28301    | 954.74946  |

Table XIVS. Moments of inertia of isomer III, its isomers, and transition state species (amu\*bohr<sup>2</sup>).

| <b>IIIa</b> | <b>IIIts1</b> | <b>IIIb</b> | <b>IIIts2</b> | <b>IIIc</b> |
|-------------|---------------|-------------|---------------|-------------|
| 375.47233   | 378.94272     | 339.61441   | 335.43110     | 225.60204   |
| 644.68042   | 648.31232     | 596.08554   | 648.81956     | 926.25131   |
| 649.78796   | 659.12210     | 681.90812   | 742.21002     | 1071.42785  |
